# Supplementary material
Source: ML conference proceedings conference paper supplement (https://openreview.net/forum?id=Tg9AvNbTUJo)
Supplement: supplementary_material [file attachment]

## A APPENDIX

**Lemma 1.** *The vector field  $f : \mathbb{R}^{K+D} \rightarrow \mathbb{R}^K$  such that*

$$f(v, u) = \mathbb{E} \left[ \left( R + \gamma \max_{a' \in \mathcal{A}} Q_{v,u}(X', a') - \xi Q_{v,u}(X, A) \right) \phi_u(X, A) \right] - \epsilon v$$

*is Lipschitz-continuous.*

*Proof.* We must show that

$$\|f(v, u) - f(w, z)\| \leq L_f \|v - w\| + L_f \|u - z\|.$$

For a fixed transition tuple  $(x, a, r, x') \in \mathcal{X} \times \mathcal{A} \times I_R \times \mathcal{X}$ , we define  $f_{x,a,r,x'} : \mathbb{R}^{K+D} \rightarrow \mathbb{R}^K$  such that

$$f_{x,a,r,x'}(v, u) = \left( r + \gamma \max_{a' \in \mathcal{A}} Q_{v,u}(x', a') - \xi Q_{v,u}(x, a) \right) \phi_u(x, a) + \epsilon v.$$

We show that  $f_{x,a,r,x'}$  is Lipschitz-continuous with a constant  $L_f$  that does not depend on  $(x, a, r, x')$ . Consequently,  $f = \mathbb{E}[f_{x,a,r,x'}]$  is also Lipschitz-continuous with the same constant.

We assume  $(x, a, r, x')$  is fixed and we use the notation:

- $A(v, u) = r + \gamma \max_{a' \in \mathcal{A}} Q_{v,u}(x', a')$ ;
- $B(v, u) = \xi Q_{v,u}(x, a)$ ;
- $C(u) = \phi_u(x, a)$ ;
- $D(v) = \epsilon v$ .

Then we have that  $f_{x,a,r,x'}(v, u) = A(v, u)C(u) - B(v, u)C(u)$ . We move on using triangle inequalities.

$$\begin{aligned} \|f_{x,a,r,x'}(v, u) - f_{x,a,r,x'}(w, z)\| &= \\ &= \|A(v, u)C(u) - B(v, u)C(u) - A(w, z)C(z) + B(w, z)C(z) + D(v) - D(w)\| \\ &\leq \|A(v, u)C(u) - A(w, z)C(z)\| + \|B(v, u)C(u) - B(w, z)C(z)\| + \\ &\quad + \|D(v) - D(w)\| \\ &\leq \|A(v, u)(C(u) - C(z))\| + \|(A(v, u) - A(w, z))C(z)\| + \\ &\quad + \|B(v, u)(C(u) - C(z))\| + \|(B(v, u) - B(w, z))C(z)\| \\ &\quad + \|D(v) - D(w)\|. \end{aligned}$$

We observe that

$$\|A(v, u)\| \leq r_{max} + \gamma \max_{a' \in \mathcal{A}} \|\phi_u(x', a')\| \|Proj(v)\| \leq r_{max} + \gamma \rho$$

using Cauchy-Schwartz inequality, Assumption (ii) and the projection of  $v$ . Also,

$$\begin{aligned} \|C(u) - C(z)\| &\leq \|\phi_u(x, a) - \phi_z(x, a)\| \\ &\leq L_\phi \|u - z\| \end{aligned}$$

from Assumption (ii). We also have that

$$\begin{aligned} \|A(v, u) - A(w, z)\| &\leq \gamma \|Proj(v) - Proj(w)\| + \|Proj(w)\| \|u - z\| \\ &\leq \gamma \|v - w\| + \rho \|u - z\| \end{aligned}$$

for the same reasons. From assumption (iii),

$$\|C(u)\| = 1.$$

Now,

$$\|B(v, u)\| \leq \xi \|\phi_u(x, a)\| \|Proj(v)\| \leq \xi \rho$$

and

$$\begin{aligned} \|B(v, u) - B(w, z)\| &\leq \|\xi(\phi_u(x, a) - \phi_z(x, a))Proj(u)\| + \|\xi\phi_z(x, a)(Proj(v) - Proj(z))\| \\ &\leq \xi\rho L_\phi \|u - z\| + \xi \|v - w\|. \end{aligned}$$

Finally, we can see that

$$\|D(v) - D(w)\| = \epsilon \|v - w\|.$$

Putting everything together with the help of Cauchy-Schwartz inequalities, the conclusion follows.  $\square$

**Lemma 2.** *The sequence of random vectors  $\{M_t\}_{t \geq 0}$  such that*

$$\begin{aligned} M_{t+1} &= (r_t + \gamma \max_{a' \in \mathcal{A}} Q_{v_t, u_t}(x'_t, a'_t) - \xi Q_{v_t, u_t}(x_t, a_t))\phi_{u_t}(x_t, a_t) - \\ &\quad - \mathbb{E}\left[(R + \gamma \max_{a' \in \mathcal{A}} Q_{v, u}(X', a') - \xi Q_{v, u}(X, A))\phi_u(X, A)\right] \end{aligned}$$

*is a martingale difference sequence verifying*

$$\mathbb{E}[\|M_{t+1}\|^2 \mid \mathcal{F}_t] \leq c_M(1 + \|v_t\|^2 + \|u_t\|^2).$$

*Proof.* For  $\{M_t\}_{t \geq 0}$  to be a martingale difference sequence, we must have that

1.  $\mathbb{E}[M_{t+1} \mid \mathcal{F}_t] = 0, \quad \forall t \geq 0;$
2.  $\mathbb{E}[\|M_t\|] < \infty, \quad \forall t \geq 0.$

From Assumption (i), we directly conclude property 1:

$$\mathbb{E}[M_{t+1} \mid \mathcal{F}_t] = \mathbb{E}[M_{t+1}] = 0.$$

To establish property 2, we observe that every term appearing on the definition of  $M_t$  is bounded by some constant. The same observation is sufficient to conclude the second moment is also bounded by some constant.  $\square$

**Lemma 3.** *For each  $u \in \mathbb{R}^D$ , the o.d.e.*

$$\dot{v}_t = f(v_t, u)$$

*has a unique and globally asymptotically stable equilibrium  $v^*(u)$ , where  $v^* : \mathbb{R}^D \rightarrow \mathbb{R}^K$  is Lipschitz-continuous.*

*Proof.* We start by establishing the existence and uniqueness of an equilibrium,  $v^*(u)$ , for each  $u \in \mathbb{R}^D$ , by making use of Banach's fixed point theorem. We then show that  $v^*$  is Lipschitz-continuous. Finally, we show that  $v^*(u)$  is globally asymptotically stable using a Lyapunov argument.

Any solution to the o.d.e. must verify

$$\dot{v}_t = f(v_t, u) = 0.$$

Equivalently, and ignoring for a moment the projection of  $Proj(v)$  of  $v$  in  $Q$ , any solution is time-invariant and we can, therefore, drop the dependency on  $t$  and, writing in the form of a fixed-point equation, we must have that

$$v = \frac{1}{\xi} \Sigma_u^{-1} \mathbb{E}\left[(R + \gamma \max_{a' \in \mathcal{A}} Q_{v, u}(X', a'))\phi_u(X, A)\right] - \frac{\epsilon}{\xi} \Sigma_u^{-1} v.$$

We used assumption (iv) to invert the matrix  $\Sigma_u$ . Let us refer to the right-hand side as  $T : \mathbb{R}^K \rightarrow \mathbb{R}^K$ . As  $\mathbb{R}^K$  is a Banach space, contractiveness of  $T$  will allow us to conclude the existence and

uniqueness of solution to the fixed point equation above. We observe that

$$\begin{aligned}
\|T(v) - T(w)\| &\leq \left\| \frac{1}{\xi} \Sigma_u^{-1} \gamma \mathbb{E} \left[ \left( \max_{a' \in \mathcal{A}} Q_{v,u}(X', a') - \max_{a' \in \mathcal{A}} Q_{w,u}(X', a') \right) \phi_u(X, A) \right] \right\| + \\
&\quad + \left\| \frac{\epsilon}{\xi} \Sigma_u^{-1} (v - w) \right\| \\
&\leq \frac{\gamma}{\xi \sigma} \mathbb{E} \left[ \max_{a' \in \mathcal{A}} |\phi_u(X', a') \cdot v - \phi_u(X', a') \cdot w| \|\phi_u(X, A)\| \right] + \\
&\quad + \frac{\epsilon}{\xi \sigma} \|v - w\| \\
&\leq \frac{\gamma + \epsilon}{\xi \sigma} \|v - w\|
\end{aligned}$$

From assumption (iv),  $\frac{\gamma + \epsilon}{\xi \sigma} < 1$  and contractiveness holds. Therefore, there exists a unique solution  $v^* \in \mathbb{R}^K$  for each  $u \in \mathbb{R}^D$ . Importantly, we can also obtain that  $\|v^*(u)\| \leq \frac{1}{\xi \sigma - \epsilon} (r_{\max} + \gamma \rho) < \rho$ . Therefore, the solution of the o.d.e. is inside the ball  $B_\rho$ .

Now, we show that the solution  $v^* : \mathbb{R}^D \rightarrow \mathbb{R}^K$  obtained is Lipschitz-continuous on  $u \in \mathbb{R}^K$ . The proof is very similar to the one of contractiveness of  $T$ . For that, we write

$$\begin{aligned}
\|v^*(u) - v^*(w)\| &\leq \frac{\gamma}{\xi \sigma} \mathbb{E} \left[ \max_{a' \in \mathcal{A}} |\phi_u(X', a') \cdot v^*(u) - \phi_w(X', a') \cdot v^*(w)| \|\phi_u(X, A)\| \right] \\
&\leq \frac{\gamma \rho}{\xi \sigma} L_\phi \|u - w\|.
\end{aligned}$$

Finally, having established uniqueness and existence of a Lipschitz-solution of the o.d.e.,  $v^*(u)$ , we prove it is globally asymptotically stable. We consider the Lyapunov function  $l_u : \mathbb{R}^K \rightarrow \mathbb{R}$  such that  $l_u(v) = \frac{1}{2} \|v - v^*(u)\|^2$ . We have that  $l_u(v) = 0$  if and only if  $v = v^*(u)$ . We also have that  $l_u(v) > 0$  if and only if  $v \neq v^*(u)$ . To establish globally asymptotic stability, it remains only show that  $\dot{l}_u(v) < 0$  whenever  $v \neq v^*(u)$  and  $\dot{l}_u(v) = 0$  otherwise. We start by writing

$$\begin{aligned}
\dot{l}_u(v) &= \nabla_v l_u(v) \cdot \dot{v} \\
&= (v - v^*(u)) \cdot f(v, u) \\
&= (v - v^*(u)) \cdot \mathbb{E} \left[ (R + \gamma \max_{a' \in \mathcal{A}} Q_{v,u}(X', a') - \xi Q_{v,u}(X, A)) \phi_u(X, A) + \epsilon v \right] \\
&= (v - v^*(u)) \cdot \mathbb{E} \left[ (R + \gamma \max_{a' \in \mathcal{A}} Q_{v,u}(X', a')) \phi_u(X, A) + \epsilon v \right] - \xi (v - v^*(u)) \Sigma_u v.
\end{aligned}$$

Now, we subtract the quantity  $\mathbb{E} \left[ (R + \gamma \max_{a' \in \mathcal{A}} Q_{v^*(u),u}(X', a')) \phi_u(X, A) + \epsilon v^*(u) \right] - \xi \Sigma_u v^*(u)$ , which we know equals 0, multiplied by  $(v - v^*(u))$ . We can rearrange the resulting expression and obtain

$$\begin{aligned}
&(v - v^*(u)) \cdot \mathbb{E} \left[ (R + \gamma \max_{a' \in \mathcal{A}} Q_{v,u}(X', a') - \gamma \max_{a' \in \mathcal{A}} Q_{v^*(u),u}(X', a')) \phi_u(X, A) + \epsilon (v - v^*(u)) \right] - \\
&\quad - \xi (v - v^*(u)) \Sigma_u (v - v^*(u)).
\end{aligned}$$

Since  $\xi > 0$  is sufficiently large, we can conclude that  $\dot{l}_u(v) < 0$  if  $(v - v^*(u)) \Sigma_u (v - v^*(u)) > 0$ . Such is the case since we have positive-definiteness of  $\Sigma_u$  from assumption (iv). This concludes the result.  $\square$

**Lemma 4.** For every  $u \in \mathbb{R}^K$ , the sequence of vector fields  $\{h_{c,u}\}_{c \geq 1}$  such that  $h_{c,u} : \mathbb{R}^K \rightarrow \mathbb{R}^K$  and  $h_{c,u}(v) = \frac{f(cu, u)}{c}$ , for some continuous  $h_{\infty, u}$ , verifies

$$h_{c,u} \rightarrow h_{\infty, u}.$$

uniformly on compacts. Additionally, the o.d.e.

$$\dot{v}_t = h_{\infty, u}(v_t)$$

has the origin as its unique and globally asymptotically stable equilibrium.

*Proof.* We can expand the definition and observe

$$h_{c,u}(v) = \frac{\mathbb{E} \left[ \left( R + \gamma \max_{a' \in \mathcal{A}} Q_{cv,u}(X', a') - \xi Q_{cv,u}(X, A) \right) \phi_u(X, A) \right] - \epsilon cv}{c}.$$

We recall that  $Q$  projects  $v$  back into  $B_\rho$  once  $v > \rho$ . Therefore, as  $c \rightarrow \infty$ ,

$$h_{c,u}(v) \rightarrow -\epsilon v$$

uniformly on compacts. With  $h_{\infty,u}(v) = -\epsilon v$ , we have that  $\dot{v}_t = h_{\infty,u}(v_t)$  has the origin as unique and globally asymptotically stable equilibrium.  $\square$

**Lemma 5.** *Let  $V^* = \{(v^*(u), u), u \in \mathbb{R}^D\}$ . If  $\sup_{t \geq 0} \|u_t\| < \infty$ , then  $(v_t, u_t) \rightarrow V^*$  w.p.1.*

*Proof.* Having established Lemmas 1 to 5, we can use Theorem 2 from Borkar (2008, Chapter 6).  $\square$

**Lemma 6.** *The finite composition of Lipschitz-continuous and Lipschitz-smooth function is Lipschitz-continuous and Lipschitz-smooth.*

*Proof.* Let  $f, g : X \rightarrow Y$  such that  $f$  and  $g$  are Lipschitz-continuous with constants  $L_f$  and  $L_g$  and Lipschitz-smooth with constants  $L_{\dot{f}}$  and  $L_{\dot{g}}$  respectively. Notice that the derivatives of  $f$  and  $g$  are therefore bounded by  $C_f$  and  $C_g$ .

We show that  $f \circ g$  is Lipschitz-continuous.

$$\begin{aligned} \|(f \circ g)(x) - (f \circ g)(z)\| &= \|f(g(x)) - f(g(y))\| \\ &\leq L_f \|g(x) - g(y)\| \\ &\leq L_f L_g \|x - y\|. \end{aligned}$$

We can also show  $f \circ g$  is Lipschitz-smooth. We present the proof for the one-dimensional case.

$$\begin{aligned} \|(f \circ g)'(x) - (f \circ g)'(z)\| &= \|f'(g(x))g'(x) - f'(g(y))g'(y)\| \\ &= \|f'(g(x))g'(x) - f'(g(y))g'(y) + f'(g(x))g'(y) - f'(g(x))g'(y)\| \\ &\leq \|f'(g(x))g'(x) - f'(g(x))g'(y)\| + \|f'(g(x))g'(y) - f'(g(y))g'(y)\| \\ &\leq \|f'(g(x))\| \|g'(x) - g'(y)\| + \|g'(y)\| \|f'(g(x)) - f'(g(y))\| \\ &\leq C_f \dot{L}_g \|x - y\| + C_g L_{\dot{f}} \|g(x) - g(y)\| \\ &\leq C_f \dot{L}_g \|x - y\| + C_g L_{\dot{f}} L_g \|x - y\| \end{aligned}$$

$\square$
